# Supplementary material for: Simultaneous removal of nitrite and ammonia as dinitrogen in aqueous suspensions of a titanium(iv) oxide photocatalyst under reagent-free and metal-free conditions at room temperature
Source: Royal Society of Chemistry journal article supplement (doi:10.1039/c4ra09900a), 2014-01-01
Supplement: c4ra09900a1.pdf [file c4ra09900a1.pdf]

Supplementary information for

**Simultaneous removal of nitrite and ammonia as dinitrogen in aqueous suspensions of a titanium(IV) oxide photocatalyst under reagent-free and metal-free conditions at room temperature**

Hiroshi Kominami,\*<sup>a</sup> Ken Kitsui,<sup>b</sup> Yuki Ishiyama,<sup>a</sup> and Keiji Hashimoto<sup>a</sup>

<sup>a</sup>*Department of Applied Chemistry, Faculty of Science and Engineering, Kinki University, Kowakae, Higashiosaka, Osaka 577-8502, Japan.*

<sup>b</sup>*Graduate School of Science and Engineering Research, Kinki University, Kowakae, Higashiosaka, Osaka 577-8502, Japan.*

## 1. Experimental

### 1.1. Materials

All chemicals were used without further purification. Evonik P25 TiO<sub>2</sub> particles were used as a TiO<sub>2</sub> photocatalyst. Other metal oxides and metal double oxides were supplied by Wako Chemicals (SrTiO<sub>3</sub>, BaTiO<sub>3</sub>,  $\alpha$ -Fe<sub>2</sub>O<sub>3</sub>, FeTiO<sub>3</sub>, SnO<sub>2</sub>,  $\beta$ -SiC), Kanto Chemicals (Co<sub>3</sub>O<sub>4</sub>, MoO<sub>3</sub>, Ta<sub>2</sub>O<sub>5</sub>, BiVO<sub>4</sub>, Bi<sub>2</sub>O<sub>3</sub>, NiO, ZnO, CeO<sub>2</sub>, In<sub>2</sub>O<sub>3</sub>, CuO, Sn-doped In<sub>2</sub>O<sub>3</sub> (ITO), Nb<sub>2</sub>O<sub>5</sub>, MnO<sub>2</sub>,  $\gamma$ -Fe<sub>2</sub>O<sub>3</sub>), Kishida Chemical (ZnTiO<sub>3</sub>) and Kojundo Chemical Laboratory (WO<sub>3</sub>).

### 1.2. Photocatalytic reaction

Bare TiO<sub>2</sub> particles (50 mg) were suspended in a solution (5 cm<sup>3</sup>) containing sodium nitrite (500  $\mu$ mol, Kanto Chemicals) and ammonium sulfate (250  $\mu$ mol) in a test tube. The pH of the suspension was adjusted to 7 using sodium hydroxide solution. The tube was sealed with a rubber septum and then photoirradiated at  $\lambda > 300$  nm with a mercury arc under Ar with magnetic stirring (1000 rpm) in a water bath continuously kept at 298 K. Concentrations of NO<sub>2</sub><sup>-</sup> and nitrate (NO<sub>3</sub><sup>-</sup>) in the liquid phase were determined with a Jasco PU-2800 plus ion chromatograph equipped with an ICNI-424 column (Shodex, Japan). The concentration of NH<sub>3</sub> (in the form of NH<sub>4</sub><sup>+</sup>) in the liquid phase was determined with a Jasco PU-2800i plus ion chromatograph equipped with an YS-50 column (Shodex, Japan). The amounts of dinitrogen (N<sub>2</sub>), dinitrogen monoxide (N<sub>2</sub>O) and hydrogen (H<sub>2</sub>) in the gas phase of reaction mixtures were measured using a Shimadzu GC-8A gas chromatograph equipped with an MS-5A column.

### 1.3. Apparent quantum efficiency (AQE) measurement

To obtain AQE in the reaction system, a UV light-emitting diode (UV-LED, POT-365, Asahi Spectra Co.,Ltd,  $3.23 \text{ mW cm}^{-2}$ , maximum energy at  $\lambda = 365 \text{ nm}$ ) was also used as a light source. A spectrum and light intensity of the UV-LED were determined using a spectroradiometer (USR-45D, Ushio, Tokyo).

## 2. Results

### 2.1. Reactions over various metal (double) oxides

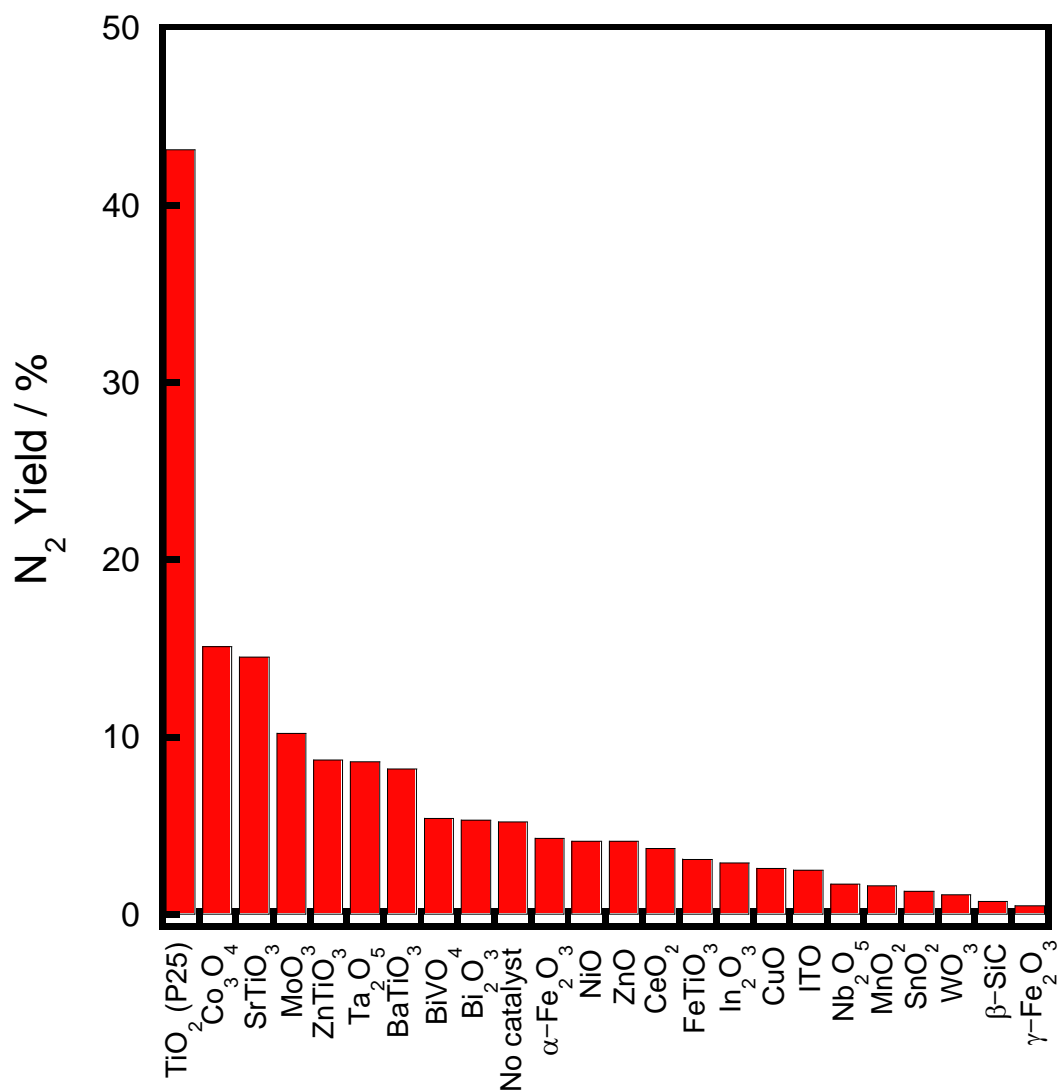

**Fig. S1** Yield of N<sub>2</sub> in photocatalytic reduction of NO<sub>2</sub><sup>-</sup> in aqueous suspensions of various metal-free metal (double) oxides in the presence of NH<sub>3</sub><sup>+</sup> at pH 7 under irradiation of UV light for 5 h at 298 K.
